# Supplementary material for: Acquired resistance to the second-generation androgen receptor antagonist enzalutamide in castration-resistant prostate cancer
Source: PubMed Central journal article supplement (PMC5041979; doi:10.18632/oncotarget.8456), 2016-03-29
Supplement: oncotarget-07-26259-s001.pdf [file oncotarget-07-26259-s001.pdf]

# Acquired resistance to the second-generation androgen receptor antagonist enzalutamide in castration-resistant prostate cancer

## Supplementary Materials

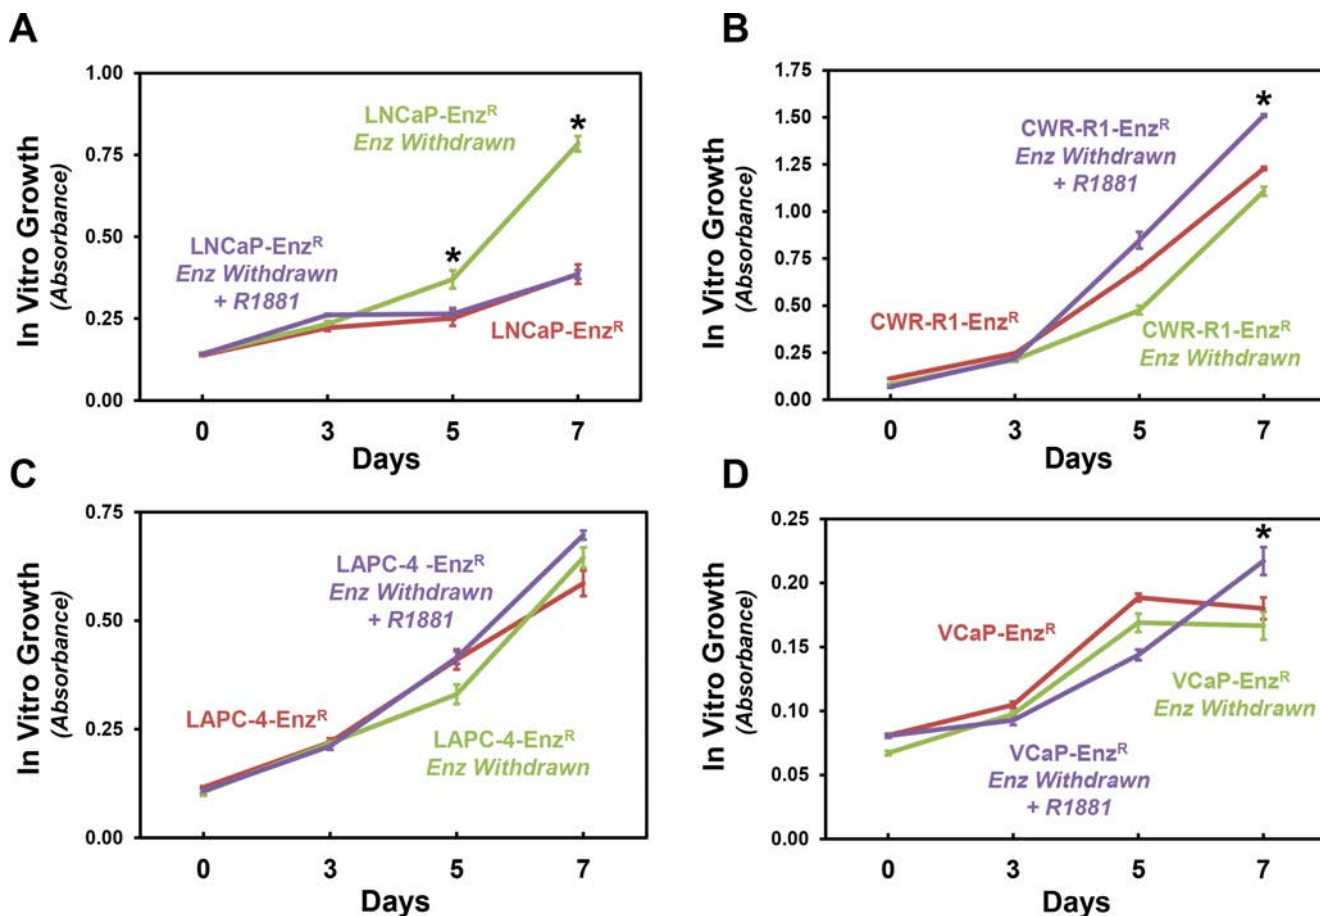

**Supplementary Figure S1: Withdrawal of enzalutamide in Enz<sup>R</sup> cell lines results in heterogeneous growth responses.** Growth rates of LNCaP (A), CWR-R1 (B), LAPC-4 (C), and VCaP (D) Enz<sup>R</sup> (grown in 10 μM enzalutamide) cells and cells withdrawn from enzalutamide and placed into vehicle control growth media (Enz withdrawn) or cells withdrawn from enzalutamide with 1 nM R1881 added. Cell growth was measured over the course of (7 days) by MTT. Asterisk represent conditions where  $p < 0.05$ .

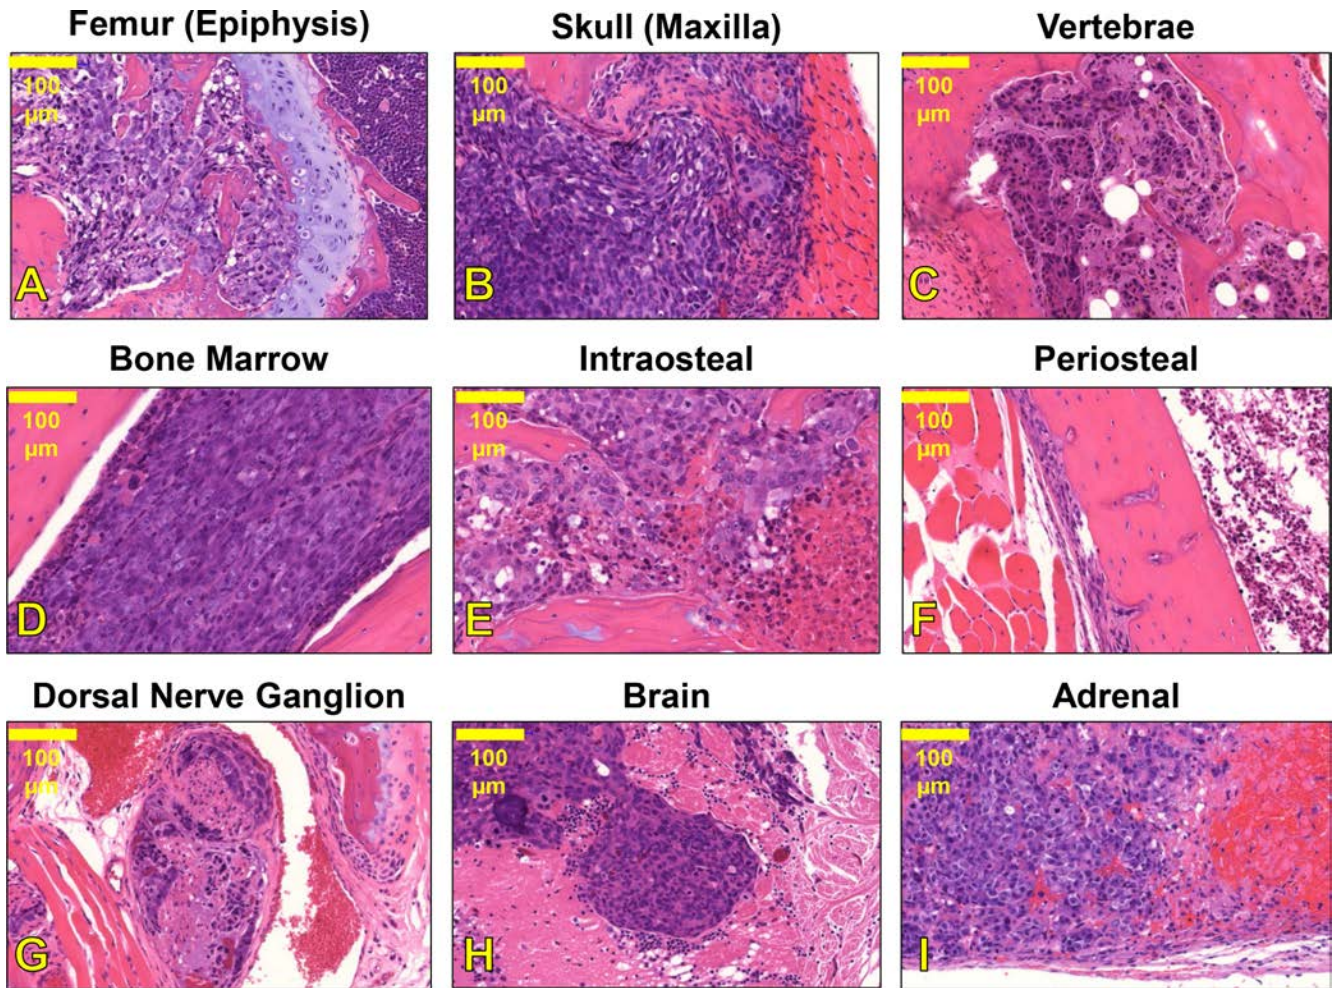

**Supplementary Figure S2: Representative images of histological sections of metastases obtained from CWR-R1 Enz<sup>R</sup> injected mice stained with Hematoxylin and Eosin.** Representative images of histological sections stained with Hematoxylin and Eosin from metastases obtained from the CB-17 SCID mice intracardiac injected with 2.5e6 CWR-R1 Enz<sup>R</sup> cells lentivirally transduced with Promoter-less Luciferase-2 (Promega) after about 4 weeks post injection. Long bone [Femur Epiphysis (A)], Skull [Maxilla (B)], and Vertebral (C) bone metastasis were identified. Bone metastasis formation occurred within the Bone Marrow (D), as well as both Intraosteal (E) and Periosteal (F). Metastatic formation also occurred at the Dorsal Root Nerve Ganglion (G), in the Brain (H) and Adrenal glands (I). All images are at 20× magnification, and were analyzed and identified by a pathologist.



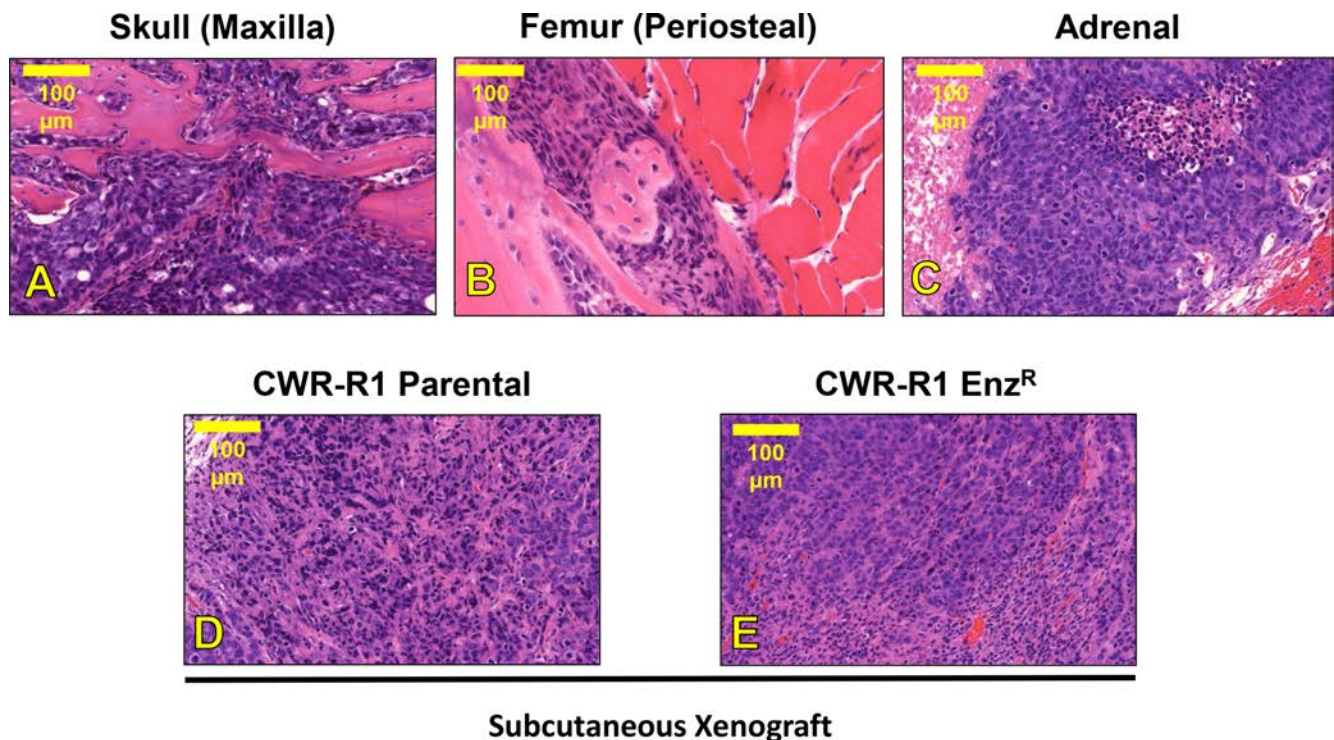

### Subcutaneous Xenograft

**Supplementary Figure S3: Representative images of histological sections of metastases obtained from CWR-R1 injected mice stained with hematoxylin and eosin.** Representative images of histological sections stained with Hematoxylin and Eosin from metastases obtained from the CB-17 SCID mice intracardiac injected with  $2.5 \times 10^6$  CWR-R1 cells lentivirally transduced with Promoter-less Luciferase-2 (Promega) after about 6 weeks post injection. Similar to CWR-R1 Enz<sup>R</sup> cells, Skull [Maxilla (A)] and Femoral (B) bone metastases were identified, as well as adrenal metastases (C). Representative images of subcutaneous tumors both CWR-R1 parental (D) and CWR-R1 Enz<sup>R</sup> cells (E) shows very similar histology between the two cell lines. All images are at 20× magnification, and were analyzed and identified by a pathologist.

**Supplementary Table S1: Summary of expression changes between treatment groups**

| Parental vs. 48 hr Enz                                                       | LNCaP      | LAPC-4     | CWR-R1     | VCAP       |
|------------------------------------------------------------------------------|------------|------------|------------|------------|
| <b>Total Gene Changes<sup>a</sup></b>                                        | <b>146</b> | <b>334</b> | <b>237</b> | <b>215</b> |
| <b>Enz Promoted (%)</b><br><i>(Expression Increases in Response to Enz)</i>  | 91 (62%)   | 132 (39%)  | 122 (51%)  | 127 (59%)  |
| <b>Enz Inhibited (%)</b><br><i>(Expression Decreases in Response to Enz)</i> | 55 (38%)   | 212 (61%)  | 115 (49%)  | 88 (41%)   |

| Parental vs. EnzR                       | LNCaP       | LAPC-4     | CWR-R1     | VCAP       |
|-----------------------------------------|-------------|------------|------------|------------|
| <b>Total Gene Changes<sup>a</sup></b>   | <b>1069</b> | <b>985</b> | <b>404</b> | <b>649</b> |
| <b>Expression in EnzR Increased (%)</b> | 645 (60%)   | 527 (54%)  | 199 (49%)  | 362 (56%)  |
| <b>Expression in EnzR Decreased (%)</b> | 424 (40%)   | 458 (46%)  | 205 (51%)  | 287 (44%)  |

| 48 hr Enz vs. Enz <sup>R</sup>                                                                                       | LNCaP      | LAPC-4    | CWR-R1     | VCAP       |
|----------------------------------------------------------------------------------------------------------------------|------------|-----------|------------|------------|
| <b>Total Gene Changes<sup>a</sup></b>                                                                                | <b>391</b> | <b>26</b> | <b>221</b> | <b>238</b> |
| <b>Overlap with Parental vs. 48 hr Enz Genes</b><br><i>(AR-Pathway Restored genes)</i><br><i>(% of total)</i>        | 146 (37%)  | 23 (88%)  | 116 (52%)  | 143 (60%)  |
| <b>Enz Promoted, Further Repressed</b><br><i>(Expression increases further in EnzR)</i>                              | 64         | 6         | 70         | 42         |
| <b>Enz Inhibited, Further Promoted</b><br><i>(Expression decreases further in EnzR)</i>                              | 31         | 2         | 12         | 30         |
| <b>Enz Promoted, Expression Reversed</b><br><i>(Expression Reversed in EnzR)</i>                                     | 27         | 7         | 13         | 41         |
| <b>Enz Inhibited, Expression Reversed</b><br><i>(Expression Reversed in EnzR)</i>                                    | 24         | 8         | 21         | 30         |
| <b>No Overlap with Parental vs. 48 hr Enz Genes</b><br><i>(Novel non-AR-associated genes)</i><br><i>(% of total)</i> | 245 (63%)  | 3 (12%)   | 105 (48%)  | 95 (40%)   |
| <b>Novel Increased Genes in EnzR</b>                                                                                 | 103        | 1         | 53         | 43         |
| <b>Novel Decreased Genes Decreased in EnzR</b>                                                                       | 142        | 2         | 52         | 52         |

a: Changes represent differentially expressed genes using the Significance Analysis of Microarrays (SAM), which performs appropriate tests for multiplicity. Genes that met a 5% false discovery rate (FDR) were retained.

**Supplementary Table S2: Gene expression reversal of AR-Associated genes**

| Symbol   | Gene Name                                                                               | Entrez ID | LNCaP              |                    | LAPC-4             |                    | CWR-R1             |                    | VCaP               |                    |      |
|----------|-----------------------------------------------------------------------------------------|-----------|--------------------|--------------------|--------------------|--------------------|--------------------|--------------------|--------------------|--------------------|------|
|          |                                                                                         |           | Parental vs. 48 hr | 48 hr vs. Parental | Parental vs. 48 hr | 48 hr vs. Parental | Parental vs. 48 hr | 48 hr vs. Parental | Parental vs. 48 hr | 48 hr vs. Parental |      |
|          |                                                                                         |           | Enz                | EnzR               | Enz                | EnzR               | Enz                | EnzR               | Enz                | EnzR               |      |
| Column 1 | Column 2                                                                                | Column 3  | Column 4           | Column 5           | Column 6           | Column 7           | Column 8           | Column 9           | Column 10          | Column 11          |      |
| ABCA1    | ATP-binding cassette, sub-family A (ABC1), member 1                                     | 19        |                    |                    | 1.31               | 0.81               |                    |                    |                    |                    |      |
| ABCC4    | ATP-binding cassette, sub-family C (CFTR/MRP), member 4                                 | 10257     |                    |                    |                    |                    | 1.04               | 0.90               |                    |                    |      |
| ACLY     | aminoacylase 1                                                                          | 95        | 0.25               | 1.37               |                    |                    |                    |                    |                    |                    |      |
| ACSM3    | acyl-CoA synthetase medium-chain family member 3                                        | 6296      | 1.32               | 0.39               |                    |                    |                    |                    |                    |                    |      |
| ACTA2    | actin, alpha 2, smooth muscle, aorta                                                    | 59        |                    |                    |                    |                    | 0.87               | 1.07               |                    |                    |      |
| ADD3     | adducin 3 (gamma)                                                                       | 120       | 0.76               | 2.19               |                    |                    |                    |                    |                    |                    |      |
| ADM      | adrenomedullin                                                                          | 133       |                    |                    |                    |                    | 1.22               | 0.63               |                    |                    |      |
| AGA      | aspartylglucosaminidase                                                                 | 175       | 1.78               | 0.84               |                    |                    |                    |                    |                    |                    |      |
| AGR2     | anterior gradient homolog 2 (Xenopus laevis)                                            | 10551     |                    |                    |                    |                    |                    |                    |                    | 1.75               | 0.43 |
| AKR1C3   | aldo-keto reductase family 1, member C3 (3-alpha hydroxysteroid dehydrogenase, type II) | 8644      |                    |                    |                    |                    |                    |                    |                    | 1.14               | 0.41 |
| ALB      | albumin                                                                                 | 213       |                    |                    |                    |                    | 0.88               | 1.81               |                    |                    |      |
| ALDH1A1  | aldehyde dehydrogenase 1 family, member A1                                              | 216       |                    |                    |                    |                    |                    |                    |                    | 0.65               | 2.17 |
| ALDH1A3  | aldehyde dehydrogenase 1 family, member A3                                              | 220       |                    |                    |                    |                    | 0.78               | 1.11               | 1.23               | 0.54               |      |
| ANG      | angiogenin, ribonuclease, RNase A family, 5                                             | 283       | 1.23               | 0.79               |                    |                    |                    |                    |                    |                    |      |
| ANXA1    | annexin A1                                                                              | 301       |                    |                    | 1.28               | 0.75               |                    |                    |                    | 1.55               | 0.45 |
| APOD     | apolipoprotein D                                                                        | 347       | 0.30               | 1.25               |                    |                    |                    |                    |                    |                    |      |
| ATP1B1   | ATPase, Na+/K+ transporting, beta 1 polypeptide                                         | 481       |                    |                    |                    |                    |                    |                    |                    | 1.75               | 0.72 |
| BAMBI    | BMP and activin membrane-bound inhibitor homolog (Xenopus laevis)                       | 25805     | 1.39               | 0.33               |                    |                    |                    |                    |                    | 2.43               | 0.45 |
| BCL2L12  | BCL2-like 12 (proline rich)                                                             | 83596     |                    |                    |                    |                    |                    |                    |                    | 0.92               | 1.17 |
| BRP44    | brain protein 44                                                                        | 25874     | 2.23               | 0.78               |                    |                    |                    |                    |                    | 0.75               | 1.38 |
| BTG3     | BTG family, member 3                                                                    | 10950     |                    |                    |                    |                    |                    |                    |                    | 0.87               | 1.77 |
| C12orf24 | chromosome 12 open reading frame 24                                                     | 29902     | 1.28               | 0.65               |                    |                    |                    |                    |                    |                    |      |
| C19orf48 | chromosome 19 open reading frame 48                                                     | 84798     |                    |                    |                    |                    |                    |                    |                    | 0.75               | 1.22 |
| C1orf116 | chromosome 1 open reading frame 116                                                     | 79098     | 1.31               | 0.71               | 0.11               | 1.31               |                    |                    |                    |                    |      |
| C3orf14  | chromosome 3 open reading frame 14                                                      | 57415     |                    |                    | 0.70               | 1.18               |                    |                    |                    |                    |      |
| C3orf58  | chromosome 3 open reading frame 58                                                      | 205428    |                    |                    |                    |                    |                    |                    |                    | 0.69               | 1.20 |
| C7orf63  | chromosome 7 open reading frame 63                                                      | 79846     |                    |                    |                    |                    | 0.90               | 1.09               |                    |                    |      |
| C9orf152 | chromosome 9 open reading frame 152                                                     | 401546    |                    |                    |                    |                    |                    |                    |                    | 1.21               | 0.64 |
| CAMK2N1  | calcium/calmodulin-dependent protein kinase II inhibitor 1                              | 55450     |                    |                    |                    |                    | 1.18               | 0.89               |                    |                    |      |
| CCNO     | cyclin O                                                                                | 10309     |                    |                    |                    |                    | 2.17               | 0.58               |                    |                    |      |
| CD24     | CD24 molecule                                                                           | 100133941 |                    |                    |                    |                    |                    |                    |                    | 1.15               | 0.63 |
| CD9      | CD9 molecule                                                                            | 928       |                    |                    |                    |                    |                    |                    |                    | 1.23               | 0.75 |
| CDH2     | cadherin 2, type 1, N-cadherin (neuronal)                                               | 1000      |                    |                    |                    |                    |                    |                    |                    | 1.14               | 0.81 |

|           |                                                                                |        |      |      |      |      |      |      |      |      |
|-----------|--------------------------------------------------------------------------------|--------|------|------|------|------|------|------|------|------|
| CDK19     | cyclin-dependent kinase 19                                                     | 23097  |      |      |      |      | 1.17 | 0.86 |      |      |
| CENPN     | centromere protein N                                                           | 55839  | 1.35 | 0.87 |      |      |      |      |      |      |
| CHST15    | carbohydrate (N-acetylgalactosamine 4-sulfate 6-O) sulfotransferase 15         | 51363  |      |      |      |      |      |      | 1.21 | 0.85 |
| CKS1B     | CDC28 protein kinase regulatory subunit 1B                                     | 1163   | 1.61 | 0.57 |      |      |      |      |      |      |
| COL4A5    | collagen, type IV, alpha 5                                                     | 1287   |      |      |      |      | 0.85 | 1.22 | 0.89 | 1.40 |
| COLEC12   | collectin sub-family member 12                                                 | 81035  | 0.79 | 3.29 |      |      |      |      |      |      |
| CRIP2     | cysteine-rich protein 2                                                        | 1397   |      |      |      |      | 1.15 | 0.73 |      |      |
| CXCR7     | chemokine (C-X-C motif) receptor 7                                             | 57007  | 0.30 | 1.18 |      |      | 1.30 | 0.81 |      |      |
| CXXC5     | CXXC finger protein 5                                                          | 51523  |      |      |      |      |      |      | 1.20 | 0.81 |
| CYB5A     | cytochrome b5 type A (microsomal)                                              | 1528   |      |      |      |      |      |      | 0.73 | 1.77 |
| CYP4V2    | cytochrome P450, family 4, subfamily V, polypeptide 2                          | 285440 |      |      |      |      |      |      | 1.18 | 0.85 |
| CYP4X1    | cytochrome P450, family 4, subfamily X, polypeptide 1                          | 260293 |      |      |      |      |      |      | 1.60 | 0.84 |
| DBT       | dihydroliipoamide branched chain transacylase E2                               | 1629   |      |      |      |      |      |      | 0.90 | 1.21 |
| DDIT4L    | DNA-damage-inducible transcript 4                                              | 54541  |      |      |      |      |      |      | 0.88 | 1.15 |
| DLX1      | distal-less homeobox 1                                                         | 1745   |      |      |      |      | 0.89 | 1.12 |      |      |
| EEF1A2    | eukaryotic translation elongation factor 1 alpha 2                             | 1917   |      |      |      |      |      |      | 1.19 | 0.81 |
| EHF       | ets homologous factor                                                          | 26298  | 1.77 | 0.81 |      |      |      |      |      |      |
| ELOVL4    | elongation of very long chain fatty acids (FEN1/Elo2, SUR4/Elo3, yeast)-like 4 | 6785   |      |      |      |      | 1.17 | 0.78 |      |      |
| ENDOD1    | endonuclease domain containing 1                                               | 23052  |      |      |      |      | 0.68 | 1.09 |      |      |
| EXO1      | exonuclease 1                                                                  | 9156   | 2.04 | 0.76 |      |      |      |      |      |      |
| FAM111A   | family with sequence similarity 111, member A                                  | 63901  | 0.64 | 1.13 |      |      |      |      |      |      |
| FAM174B   | family with sequence similarity 174, member B                                  | 400451 | 0.63 | 1.42 |      |      |      |      |      |      |
| FKBP5     | FK506 binding protein 5                                                        | 2289   | 1.29 | 0.79 |      |      |      |      | 0.54 | 1.90 |
| FZD4      | frizzled homolog 4 (Drosophila)                                                | 8322   |      |      |      |      |      |      | 1.05 | 0.77 |
| GCNT1     | glucosaminyl (N-acetyl) transferase 1, core 2                                  | 2650   | 5.51 | 0.51 |      |      |      |      |      |      |
| GUCY1A3   | guanylate cyclase 1, soluble, alpha 3                                          | 2982   |      |      |      |      | 0.72 | 1.17 | 0.82 | 1.32 |
| H2AFJ     | H2A histone family, member J                                                   | 55766  |      |      |      |      | 0.80 | 1.39 |      |      |
| HBQ1      | hemoglobin, theta 1                                                            | 3049   | 0.78 | 1.18 |      |      | 1.06 | 0.94 | 0.83 | 1.23 |
| HIBADH    | 3-hydroxyisobutyrate dehydrogenase                                             | 11112  | 1.46 | 0.63 |      |      |      |      |      |      |
| HIST1H2BK | histone cluster 1, H2bk                                                        | 85236  |      |      |      |      |      |      | 1.15 | 0.65 |
| HIST2H2BE | histone cluster 2, H2be                                                        | 8349   |      |      |      |      |      |      | 1.12 | 0.80 |
| HLA-A     | major histocompatibility complex, class I, A                                   | 3105   |      |      |      |      |      |      | 1.12 | 0.67 |
| HOMER2    | homer homolog 2 (Drosophila)                                                   | 9455   |      |      | 0.36 | 1.19 |      |      |      |      |
| ID1       | inhibitor of DNA binding 1, dominant negative helix-loop-helix protein         | 3397   | 4.44 | 0.76 |      |      |      |      |      |      |
| ID2       | inhibitor of DNA binding 2, dominant negative helix-loop-helix protein         | 3398   |      |      |      |      |      |      | 1.54 | 0.66 |

|         |                                                                                     |       |      |      |      |      |      |      |      |
|---------|-------------------------------------------------------------------------------------|-------|------|------|------|------|------|------|------|
| ID3     | inhibitor of DNA binding 3, dominant negative helix-loop-helix protein              | 3399  | 1.23 | 0.67 |      |      |      |      |      |
| IER3    | immediate early response 3                                                          | 8870  |      |      |      |      |      | 1.13 | 0.61 |
| IFITM3  | interferon induced transmembrane protein 3 (1-8U)                                   | 10410 |      |      |      |      |      | 1.22 | 0.80 |
| IGFBP3  | insulin-like growth factor binding protein 3                                        | 3486  |      |      |      |      |      | 1.58 | 0.12 |
| IGFBP5  | insulin-like growth factor binding protein 5                                        | 3488  |      |      | 3.93 | 0.76 |      | 1.19 | 0.64 |
| KCNK1   | potassium channel, subfamily K, member 1                                            | 3775  |      |      |      |      | 1.10 | 0.92 |      |
| KLK2    | kallikrein-related peptidase 2                                                      | 3817  |      |      | 0.18 | 1.17 |      |      |      |
| KLK4    | kallikrein-related peptidase 4                                                      | 9622  | 1.28 | 0.42 | 0.18 | 1.57 |      | 0.63 | 3.58 |
| LAD1    | ladinin 1                                                                           | 3898  |      |      | 0.69 | 1.23 |      |      |      |
| LCP1    | lymphocyte cytosolic protein 1 (L-plastin)                                          | 3936  |      |      |      |      |      | 0.88 | 1.28 |
| LIMCH1  | LIM and calponin homology domains 1                                                 | 22998 |      |      |      |      |      | 1.60 | 0.78 |
| LITAF   | lipopolysaccharide-induced TNF factor                                               | 9516  |      |      | 1.17 | 0.86 |      | 1.09 | 0.53 |
| LMO4    | LIM domain only 4                                                                   | 8543  |      |      | 2.29 | 0.77 |      | 1.27 | 0.71 |
| LRRC31  | leucine rich repeat containing 31                                                   | 79782 |      |      | 1.33 | 0.70 |      |      |      |
| LRRN1   | leucine rich repeat neuronal 1                                                      | 57633 | 0.75 | 1.18 |      |      |      |      |      |
| LY6E    | lymphocyte antigen 6 complex, locus E                                               | 4061  | 1.27 | 0.80 |      |      |      |      |      |
| MAOA    | monoamine oxidase A                                                                 | 4128  |      |      |      |      |      | 0.63 | 7.36 |
| MCCC2   | methylcrotonoyl-CoA carboxylase 2 (beta)                                            | 64087 | 0.40 | 2.96 |      |      | 0.43 | 2.13 |      |
| MDK     | midkine (neurite growth-promoting factor 2)                                         | 4192  |      |      |      |      | 0.88 | 1.40 |      |
| MKNK2   | MAP kinase interacting serine/threonine kinase 2                                    | 2872  | 0.75 | 1.32 |      |      |      |      |      |
| MME     | membrane metallo-endopeptidase                                                      | 4311  | 0.76 | 1.41 |      |      |      | 0.86 | 1.31 |
| MNS1    | meiosis-specific nuclear structural 1                                               | 55329 | 1.25 | 0.69 |      |      |      |      |      |
| MSX1    | msh homeobox 1                                                                      | 4487  |      |      |      |      |      | 0.76 | 2.70 |
| MT1G    | metallothionein 1G                                                                  | 4495  |      |      |      |      |      | 0.79 | 2.21 |
| NBL1    | neuroblastoma, suppression of tumorigenicity 1                                      | 4681  |      |      |      |      |      | 1.12 | 0.80 |
| NFKBIA  | nuclear factor of kappa light polypeptide gene enhancer in B-cells inhibitor, alpha | 4792  |      |      |      |      |      | 1.27 | 0.79 |
| NLGN4X  | neuroigin 4, X-linked                                                               | 57502 |      |      | 1.83 | 0.86 |      |      |      |
| PAK1IP1 | PAK1 interacting protein 1                                                          | 55003 | 1.41 | 0.72 |      |      |      |      |      |
| PALM    | paralemmin                                                                          | 5064  |      |      |      |      |      | 1.19 | 0.83 |
| PBK     | PDZ binding kinase                                                                  | 55872 |      |      |      |      |      | 0.85 | 1.23 |
| PDE9A   | phosphodiesterase 9A                                                                | 5152  |      |      |      |      |      | 0.79 | 1.41 |
| PFKFB3  | 6-phosphofructo-2-kinase/fructose-2,6-biphosphatase 3                               | 5209  | 0.69 | 1.84 |      |      |      |      |      |
| PFKFB4  | 6-phosphofructo-2-kinase/fructose-2,6-biphosphatase 4                               | 5210  | 0.70 | 3.43 |      |      |      |      |      |
| PFKP    | phosphofructokinase, platelet                                                       | 5214  | 0.74 | 2.40 |      |      |      |      |      |
| PLA2G3  | phospholipase A2, group III                                                         | 50487 |      |      |      |      |      | 1.17 | 0.77 |
| PLA2G4C | phospholipase A2, group IVC (cytosolic, calcium-independent)                        | 8605  |      |      |      |      | 0.77 | 1.18 |      |

|          |                                                                                          |        |      |      |      |      |      |      |      |
|----------|------------------------------------------------------------------------------------------|--------|------|------|------|------|------|------|------|
| PMEPA1   | prostate transmembrane protein, androgen induced 1                                       | 56937  |      |      |      |      |      | 0.80 | 3.16 |
| PNPLA7   | patatin-like phospholipase domain containing 7                                           | 375775 |      |      |      |      |      | 1.30 | 0.81 |
| PPAP2A   | phosphatidic acid phosphatase type 2A                                                    | 8611   | 1.70 | 0.26 |      |      |      |      |      |
| PPIC     | peptidylprolyl isomerase C (cyclophilin C)                                               | 5480   |      |      | 2.17 | 0.79 |      |      |      |
| PPP1R1B  | protein phosphatase 1, regulatory (inhibitor) subunit 1B                                 | 84152  |      |      |      |      |      | 1.18 | 0.60 |
| PRKACB   | protein kinase, cAMP-dependent, catalytic, beta                                          | 5567   |      |      |      |      | 0.81 | 1.11 |      |
| PRUNE2   | prune homolog 2 (Drosophila)                                                             | 158471 |      |      |      |      | 0.79 | 1.86 |      |
| PTTG3P   | pituitary tumor-transforming 3 (pseudogene)                                              | 26255  | 1.33 | 0.80 |      |      |      |      |      |
| RAP1GAP  | RAP1 GTPase activating protein                                                           | 5909   |      |      |      |      |      | 1.18 | 0.57 |
| RHOBTB3  | Rho-related BTB domain containing 3                                                      | 22836  |      |      |      |      |      | 0.76 | 1.33 |
| RPL13A   | ribosomal protein L13a                                                                   | 23521  |      |      |      |      |      | 1.11 | 0.86 |
| RPL29    | ribosomal protein L29                                                                    | 6159   | 1.46 | 0.78 |      |      |      |      |      |
| SAT1     | spermidine/spermine N1-acetyltransferase 1                                               | 6303   |      |      |      |      |      | 1.24 | 0.81 |
| SBK1     | SH3-binding domain kinase 1                                                              | 388228 |      |      |      |      | 0.91 | 1.28 |      |
| SELENBP1 | selenium binding protein 1                                                               | 8991   | 0.29 | 1.75 |      |      |      |      |      |
| SERPINI1 | serpin peptidase inhibitor, clade I (neuroserpin), member 1                              | 5274   | 0.78 | 1.49 |      |      |      |      |      |
| SHROOM3  | shroom family member 3                                                                   | 57619  |      |      |      |      |      | 0.88 | 1.20 |
| SLC16A3  | solute carrier family 16, member 3 (monocarboxylic acid transporter 4)                   | 9123   |      |      |      |      | 0.89 | 1.06 |      |
| SLC27A3  | solute carrier family 27 (fatty acid transporter), member 3                              | 11000  |      |      |      |      |      | 1.19 | 0.84 |
| SLC45A3  | solute carrier family 45, member 3                                                       | 85414  | 1.32 | 0.55 |      |      |      |      |      |
| SLC6A10P | solute carrier family 6 (neurotransmitter transporter, creatine), member 10 (pseudogene) | 386757 | 0.82 | 1.25 |      |      |      |      |      |
| SOCS2    | suppressor of cytokine signaling 2                                                       | 8835   |      |      |      |      | 1.58 | 0.70 | 0.50 |
| SPRYD5   | SPRY domain containing 5                                                                 | 84767  | 0.69 | 1.18 |      |      |      |      |      |
| STEAP1   | six transmembrane epithelial antigen of the prostate 1                                   | 26872  |      |      |      |      |      | 0.56 | 1.22 |
| STEAP2   | six transmembrane epithelial antigen of the prostate 2                                   | 261729 |      |      |      |      |      | 0.84 | 1.43 |
| STK39    | serine threonine kinase 39                                                               | 27347  |      |      |      |      |      | 0.52 | 1.28 |
| TAGLN2   | transgelin 2                                                                             | 8407   | 0.78 | 1.33 |      |      |      |      |      |
| TFAP2A   | transcription factor AP-2 alpha (activating enhancer binding protein 2 alpha)            | 7020   |      |      |      |      | 0.87 | 1.08 |      |
| TFF3     | trefoil factor 3 (intestinal)                                                            | 7033   |      |      |      |      | 0.89 | 1.29 |      |
| TFPI     | tissue factor pathway inhibitor (lipoprotein-associated coagulation inhibitor)           | 7035   | 0.59 | 2.38 |      |      |      |      |      |
| THNSL2   | threonine synthase-like 2 (S. cerevisiae)                                                | 55258  |      |      |      |      |      | 1.17 | 0.81 |



|          |                                                                        |        |      |       |      |      |      |      |      |      |
|----------|------------------------------------------------------------------------|--------|------|-------|------|------|------|------|------|------|
| TMEFF2   | transmembrane protein with EGF-like and two follistatin-like domains 2 | 23671  | 0.55 | 11.49 | 0.17 | 1.14 | 0.37 | 2.19 | 0.57 | 1.63 |
| TMPRSS2  | transmembrane protease, serine 2                                       | 7113   | 0.20 | 1.28  |      |      |      |      |      |      |
| TMSB15A  | thymosin beta 15a                                                      | 11013  | 0.73 | 1.53  |      |      | 0.84 | 1.08 |      |      |
| TMSB15B  | thymosin beta 15B                                                      | 286527 | 0.77 | 1.28  |      |      | 0.91 | 1.10 |      |      |
| TNFRSF19 | tumor necrosis factor receptor superfamily, member 19                  | 55504  |      |       |      |      |      |      | 1.34 | 0.47 |
| TP53INP1 | tumor protein p53 inducible nuclear protein 1                          | 94241  | 1.66 | 0.85  |      |      |      |      |      |      |
| TPD52    | tumor protein D52                                                      | 7163   | 0.78 | 1.22  |      |      |      |      |      |      |
| UGT2B11  | UDP glucuronosyltransferase 2 family, polypeptide B11                  | 10720  | 0.69 | 1.19  |      |      |      |      |      |      |
| UGT2B15  | UDP glucuronosyltransferase 2 family, polypeptide B15                  | 7366   |      |       |      |      | 1.13 | 0.64 |      |      |
| UGT2B17  | UDP glucuronosyltransferase 2 family, polypeptide B17                  | 7367   |      |       |      |      | 1.18 | 0.69 |      |      |
| ZIC2     | Zic family member 2 (odd-paired homolog, Drosophila)                   | 7546   |      |       |      |      |      |      | 1.14 | 0.83 |
| ZNF385B  | zinc finger protein 385B                                               | 151126 |      |       |      |      |      |      | 0.52 | 1.79 |
| ZNF395   | zinc finger protein 395                                                | 55893  | 0.76 | 1.23  |      |      |      |      |      |      |
| ZSCAN18  | zinc finger and SCAN domain containing 18                              | 65982  |      |       |      |      |      |      | 1.18 | 0.81 |

*Parental vs. 48 hr Enz: fold-change mRNA expression in response to acute Enzalutamide*

*48 hr vs. EnzR: fold-change mRNA expression in response to acquisition of Enzalutamide Resistance*

**Supplementary Table S3: Gene expression of Non-AR associated genes in Enz<sup>R</sup> cells**

| Symbol   | Gene Name                                                                               | Entrez ID | LNCaP        | LAPC-4  | CWR-R1       | VCaP         |
|----------|-----------------------------------------------------------------------------------------|-----------|--------------|---------|--------------|--------------|
| Column1  | Column2                                                                                 | Column3   | Column4      | Column5 | Column6      | Column7      |
| ACADV1   | acyl-CoA dehydrogenase, very long chain                                                 | 37        | <b>1.16</b>  |         |              |              |
| ACOT13   | acyl-CoA thioesterase 13                                                                | 55856     | <b>0.720</b> |         |              |              |
| ACY1     | aminoacylase 1                                                                          | 95        |              |         |              | <b>1.31</b>  |
| ADAM15   | ADAM metallopeptidase domain 15                                                         | 8751      | <b>0.760</b> |         |              |              |
| ADAMTS1  | ADAM metallopeptidase with thrombospondin type 1 motif, 1                               | 9510      | <b>7.54</b>  |         |              | <b>1.05</b>  |
| ADD3     | adducin 3 (gamma)                                                                       | 120       |              |         | <b>1.71</b>  |              |
| AGR2     | anterior gradient homolog 2 (Xenopus laevis)                                            | 10551     | <b>1.11</b>  |         |              | <b>0.54</b>  |
| AK3      | adenylate kinase 3                                                                      | 50808     | <b>1.73</b>  |         |              |              |
| AKR1C3   | aldo-keto reductase family 1, member C3 (3-alpha hydroxysteroid dehydrogenase, type II) | 8644      | <b>0.600</b> |         |              |              |
| ALCAM    | activated leukocyte cell adhesion molecule                                              | 214       | <b>1.56</b>  |         | <b>0.770</b> |              |
| ALDH3B2  | aldehyde dehydrogenase 3 family, member B2                                              | 222       |              |         |              | <b>1.18</b>  |
| ALDOA    | aldolase A, fructose-bisphosphate                                                       | 226       | <b>1.77</b>  |         |              |              |
| ALDOC    | aldolase C, fructose-bisphosphate                                                       | 230       | <b>1.72</b>  |         | <b>0.760</b> |              |
| AMACR    | alpha-methylacyl-CoA racemase                                                           | 23600     | <b>0.52</b>  |         |              |              |
| ANG      | angiogenin, ribonuclease, RNase A family, 5                                             | 283       |              |         |              | <b>1.49</b>  |
| ANGPTL4  | angiopoietin-like 4                                                                     | 51129     |              |         |              | <b>0.890</b> |
| ANKRD37  | ankyrin repeat domain 37                                                                | 353322    |              |         |              | <b>0.920</b> |
| APP      | amyloid beta (A4) precursor protein                                                     | 351       | <b>1.94</b>  |         | <b>0.53</b>  |              |
| ARL2     | ADP-ribosylation factor-like 2                                                          | 402       | <b>1.31</b>  |         |              | <b>1.23</b>  |
| ASAP3    | ArfGAP with SH3 domain, ankyrin repeat and PH domain 3                                  | 55616     | <b>1.29</b>  |         |              |              |
| ASNS     | asparagine synthetase (glutamine-hydrolyzing)                                           | 440       | <b>0.830</b> |         |              |              |
| ASPM     | asp (abnormal spindle) homolog, microcephaly associated (Drosophila)                    | 259266    |              |         | <b>0.790</b> |              |
| ATP2A2   | ATPase, Ca <sup>++</sup> transporting, cardiac muscle, slow twitch 2                    | 488       |              |         |              | <b>0.820</b> |
| ATP6V0E2 | ATPase, H <sup>+</sup> transporting V0 subunit e2                                       | 155066    |              |         | <b>1.23</b>  | <b>0.830</b> |
| BARD1    | BRCA1 associated RING domain 1                                                          | 580       |              |         | <b>1.34</b>  |              |
| BASP1    | brain abundant, membrane attached signal protein 1                                      | 10409     | <b>0.11</b>  |         |              |              |
| BCL6     | B-cell CLL/lymphoma 6                                                                   | 604       | <b>0.840</b> |         |              | <b>0.830</b> |

|           |                                                            |           |       |      |       |       |
|-----------|------------------------------------------------------------|-----------|-------|------|-------|-------|
| BCYRN1    | brain cytoplasmic RNA 1 (non-protein coding)               | 618       | 1.41  |      | 1.55  |       |
| BEX1      | brain expressed, X-linked 1                                | 55859     |       |      | 0.430 |       |
| BEX2      | brain expressed X-linked 2                                 | 84707     |       |      | 0.810 |       |
| BIRC5     | baculoviral IAP repeat containing 5                        | 332       | 0.810 | 1.22 |       |       |
| BLVRA     | biliverdin reductase A                                     | 644       | 1.46  |      |       |       |
| BNIP3     | BCL2/adenovirus E1B 19kDa interacting protein 3            | 664       | 2.68  |      |       |       |
| BNIP3L    | BCL2/adenovirus E1B 19kDa interacting protein 3-like       | 665       | 1.46  |      |       |       |
| BSCL2     | Berardinelli-Seip congenital lipodystrophy 2 (seipin)      | 26580     | 1.27  |      | 1.42  |       |
| C10orf58  | chromosome 10 open reading frame 58                        | 84293     | 1.74  |      |       |       |
| C11orf1   | chromosome 11 open reading frame 1                         | 64776     | 0.840 |      |       |       |
| C14orf159 | chromosome 14 open reading frame 159                       | 80017     | 0.810 |      |       |       |
| C20orf108 | chromosome 20 open reading frame 108                       | 116151    | 0.770 |      |       |       |
| C7orf63   | chromosome 7 open reading frame 63                         | 79846     | 1.25  |      |       |       |
| C9orf152  | chromosome 9 open reading frame 152                        | 401546    | 1.22  |      |       | 1.3   |
| CA12      | carbonic anhydrase XII                                     | 771       | 0.650 |      |       | 0.750 |
| CALD1     | caldesmon 1                                                | 800       | 1.4   |      |       |       |
| CALU      | calumenin                                                  | 813       |       |      |       | 0.830 |
| CAMK2N1   | calcium/calmodulin-dependent protein kinase II inhibitor 1 | 55450     |       |      | 1.58  |       |
| CAP2      | CAP, adenylate cyclase-associated protein, 2 (yeast)       | 10486     | 0.45  |      | 1.53  |       |
| CBX2      | chromobox homolog 2                                        | 84733     |       |      | 0.690 |       |
| CCDC109B  | coiled-coil domain containing 109B                         | 55013     | 1.16  |      |       |       |
| CCDC53    | coiled-coil domain containing 53                           | 51019     | 1.28  |      |       |       |
| CCND1     | cyclin D1                                                  | 595       | 2.02  |      |       |       |
| CCNF      | cyclin F                                                   | 899       | 1.14  |      | 1.15  |       |
| CCNO      | cyclin O                                                   | 10309     | 1.15  |      |       |       |
| CD163L1   | CD163 molecule-like 1                                      | 283316    | 1.28  |      |       | 1.06  |
| CD24      | CD24 molecule                                              | 100133941 | 0.3   |      |       |       |
| CD9       | CD9 molecule                                               | 928       | 1.27  |      |       |       |
| CDC16     | cell division cycle 16 homolog (S. cerevisiae)             | 8881      | 1.17  |      |       |       |
| CDH3      | cadherin 3, type 1, P-cadherin (placental)                 | 1001      |       |      | 1.15  |       |
| CDK19     | cyclin-dependent kinase 19                                 | 23097     | 0.740 |      |       |       |

|          |                                                                        |        |              |  |              |              |
|----------|------------------------------------------------------------------------|--------|--------------|--|--------------|--------------|
| CDKN1A   | cyclin-dependent kinase inhibitor 1A (p21, Cip1)                       | 1026   |              |  |              | <b>0.810</b> |
| CENPN    | centromere protein N                                                   | 55839  |              |  | <b>1.22</b>  |              |
| CENPV    | centromere protein V                                                   | 201161 | <b>1.51</b>  |  |              |              |
| CGNL1    | cingulin-like 1                                                        | 84952  | <b>2.07</b>  |  |              |              |
| CHPT1    | choline phosphotransferase 1                                           | 56994  | <b>0.740</b> |  | <b>2.27</b>  | <b>0.830</b> |
| CHST15   | carbohydrate (N-acetylgalactosamine 4-sulfate 6-O) sulfotransferase 15 | 51363  | <b>0.810</b> |  |              |              |
| CIB1     | calcium and integrin binding 1 (calmyrin)                              | 10519  |              |  | <b>1.29</b>  | <b>0.900</b> |
| CKB      | creatine kinase, brain                                                 | 1152   | <b>8.76</b>  |  | <b>1.23</b>  |              |
| CLEC11A  | C-type lectin domain family 11, member A                               | 6320   | <b>0.8</b>   |  |              |              |
| COBLL1   | COBL-like 1                                                            | 22837  | <b>2.19</b>  |  | <b>1.21</b>  |              |
| COL4A5   | collagen, type IV, alpha 5                                             | 1287   | <b>0.45</b>  |  |              |              |
| CRIP2    | cysteine-rich protein 2                                                | 1397   | <b>1.64</b>  |  |              |              |
| CSRP1    | cysteine and glycine-rich protein 1                                    | 1465   | <b>1.19</b>  |  |              |              |
| CTAG2    | cancer/testis antigen 2                                                | 30848  |              |  | <b>0.850</b> |              |
| CTBS     | chitobiase, di-N-acetyl-                                               | 1486   | <b>1.49</b>  |  |              |              |
| CXADR    | coxsackie virus and adenovirus receptor                                | 1525   | <b>1.36</b>  |  | <b>1.28</b>  | <b>1.2</b>   |
| CYB5A    | cytochrome b5 type A (microsomal)                                      | 1528   | <b>0.740</b> |  |              |              |
| CYP2J2   | cytochrome P450, family 2, subfamily J, polypeptide 2                  | 1573   | <b>0.430</b> |  |              | <b>0.880</b> |
| CYP4V2   | cytochrome P450, family 4, subfamily V, polypeptide 2                  | 285440 | <b>0.710</b> |  |              |              |
| DBT      | dihydrolipoamide branched chain transacylase E2                        | 1629   | <b>1.5</b>   |  |              |              |
| DDIT4    | DNA-damage-inducible transcript 4                                      | 54541  |              |  |              | <b>0.620</b> |
| DENND1A  | DENN/MADD domain containing 1A                                         | 57706  | <b>1.77</b>  |  |              |              |
| DHRS7    | dehydrogenase/reductase (SDR family) member 7                          | 51635  |              |  | <b>1.21</b>  |              |
| DLL1     | delta-like 1 (Drosophila)                                              | 28514  |              |  | <b>0.760</b> |              |
| DLL3     | delta-like 3 (Drosophila)                                              | 10683  |              |  | <b>0.750</b> |              |
| DOPEY2   | dopey family member 2                                                  | 9980   |              |  |              | <b>1.53</b>  |
| DPM3     | dolichyl-phosphate mannosyltransferase polypeptide 3                   | 54344  | <b>0.64</b>  |  |              |              |
| DSC2     | desmocollin 2                                                          | 1824   |              |  |              | <b>1.19</b>  |
| DYNC1LI2 | dynein, cytoplasmic 1, light intermediate chain 2                      | 1783   | <b>1.22</b>  |  |              |              |
| E2F2     | E2F transcription factor 2                                             | 1870   | <b>0.870</b> |  |              |              |
| ECHDC2   | enoyl CoA hydratase domain containing 2                                | 55268  | <b>1.27</b>  |  |              | <b>1.13</b>  |



|         |                                                                    |           |       |  |       |       |
|---------|--------------------------------------------------------------------|-----------|-------|--|-------|-------|
| EEF1A2  | eukaryotic translation elongation factor 1 alpha 2                 | 1917      | 1.21  |  |       | 1.22  |
| EIF1AY  | eukaryotic translation initiation factor 1A, Y-linked              | 9086      | 0.8   |  |       |       |
| EIF2S3  | eukaryotic translation initiation factor 2, subunit 3 gamma, 52kDa | 1968      | 0.840 |  | 0.830 |       |
| ENO2    | enolase 2 (gamma, neuronal)                                        | 2026      | 2.12  |  | 1.3   | 1.13  |
| FAM174B | family with sequence similarity 174, member B                      | 400451    |       |  | 0.760 |       |
| FAM46A  | family with sequence similarity 46, member A                       | 55603     | 0.840 |  |       |       |
| FAR2    | fatty acyl CoA reductase 2                                         | 55711     |       |  | 1.23  |       |
| FGGY    | FGGY carbohydrate kinase domain containing                         | 55277     | 1.32  |  |       | 1.14  |
| FKBP11  | FK506 binding protein 11, 19 kDa                                   | 51303     |       |  | 1.17  | 0.770 |
| FLRT3   | fibronectin leucine rich transmembrane protein 3                   | 23767     |       |  | 1.11  |       |
| FZD2    | frizzled homolog 2 (Drosophila)                                    | 2535      | 1.15  |  |       |       |
| FZD4    | frizzled homolog 4 (Drosophila)                                    | 8322      | 0.750 |  |       | 1.17  |
| GABRB3  | gamma-aminobutyric acid (GABA) A receptor, beta 3                  | 2562      | 0.730 |  |       |       |
| GAGE12B | G antigen 12B                                                      | 729428    | 0.490 |  |       |       |
| GAGE12C | G antigen 12C                                                      | 729422    | 0.58  |  |       |       |
| GAGE12E | G antigen 12E                                                      | 729431    | 0.58  |  |       |       |
| GAGE12F | G antigen 12F                                                      | 100008586 | 0.600 |  |       |       |
| GAGE12G | G antigen 12G                                                      | 645073    | 0.680 |  |       |       |
| GAGE12H | G antigen 12H                                                      | 729442    | 0.58  |  |       |       |
| GAGE12I | G antigen 12I                                                      | 26748     | 0.64  |  |       |       |
| GAGE12J | G antigen 12J                                                      | 729396    | 0.650 |  |       |       |
| GAGE2A  | G antigen 2A                                                       | 729447    | 0.550 |  |       |       |
| GAGE2B  | G antigen 2B                                                       | 645037    | 0.650 |  |       |       |
| GAGE2E  | G antigen 2E                                                       | 26749     | 0.510 |  |       |       |
| GAGE4   | G antigen 4                                                        | 2576      | 0.680 |  |       |       |
| GAGE5   | G antigen 5                                                        | 2577      | 0.630 |  |       |       |
| GAGE6   | G antigen 6                                                        | 2578      | 0.600 |  |       |       |
| GALK1   | galactokinase 1                                                    | 2584      | 3.68  |  | 1.56  |       |
| GALT    | galactose-1-phosphate uridylyltransferase                          | 2592      |       |  |       | 1.21  |
| GAMT    | guanidinoacetate N-methyltransferase                               | 2593      |       |  | 1.34  |       |
| GLDC    | glycine dehydrogenase (decarboxylating)                            | 2731      | 1.32  |  |       |       |
| GNAS    | GNAS complex locus                                                 | 2778      | 1.34  |  |       |       |
| GNG10   | guanine nucleotide binding protein (G protein), gamma 10           | 2790      | 1.44  |  |       |       |
| GNG5    | guanine nucleotide binding protein (G protein), gamma 5            | 2787      | 0.710 |  |       |       |

|            |                                                                        |        |              |  |              |              |
|------------|------------------------------------------------------------------------|--------|--------------|--|--------------|--------------|
| GPD1L      | glycerol-3-phosphate dehydrogenase 1-like                              | 23171  | <b>0.730</b> |  |              |              |
| GPX1       | glutathione peroxidase 1                                               | 2876   |              |  | <b>1.56</b>  | <b>1.2</b>   |
| GSR        | glutathione reductase                                                  | 2936   | <b>0.710</b> |  |              |              |
| GSTO2      | glutathione S-transferase omega 2                                      | 119391 |              |  |              | <b>1.19</b>  |
| GTF2E2     | general transcription factor IIE, polypeptide 2, beta 34kDa            | 2961   | <b>1.36</b>  |  |              |              |
| GUCY1A3    | guanylate cyclase 1, soluble, alpha 3                                  | 2982   | <b>2.77</b>  |  |              |              |
| H2AFJ      | H2A histone family, member J                                           | 55766  | <b>10.25</b> |  |              |              |
| H3F3B      | H3 histone, family 3B (H3.3B)                                          | 3021   | <b>1.36</b>  |  |              |              |
| HENMT1     | HEN1 methyltransferase homolog 1 (Arabidopsis)                         | 113802 | <b>3.39</b>  |  | <b>0.8</b>   |              |
| HGD        | homogentisate 1,2-dioxygenase                                          | 3081   | <b>0.840</b> |  |              |              |
| HIST1H1C   | histone cluster 1, H1c                                                 | 3006   |              |  |              | <b>1.31</b>  |
| HIST1H2BK  | histone cluster 1, H2bk                                                | 85236  | <b>1.32</b>  |  |              | <b>1.17</b>  |
| HLA-A      | major histocompatibility complex, class I, A                           | 3105   | <b>0.590</b> |  |              | <b>0.790</b> |
| HLA-DMB    | major histocompatibility complex, class II, DM beta                    | 3109   | <b>2.03</b>  |  |              |              |
| HOXA11-AS1 | HOXA11 antisense RNA 1 (non-protein coding)                            | 221883 | <b>0.52</b>  |  |              | <b>1.27</b>  |
| HOXA5      | HOXA11 antisense RNA 1 (non-protein coding)                            | 221883 | <b>1.71</b>  |  | <b>1.24</b>  |              |
| HOXA9      | homeobox A9                                                            | 3205   |              |  | <b>1.29</b>  |              |
| HOXC6      | homeobox C6                                                            | 3223   | <b>1.84</b>  |  | <b>2.15</b>  |              |
| HSD17B12   | hydroxysteroid (17-beta) dehydrogenase 12                              | 51144  | <b>1.28</b>  |  | <b>0.820</b> |              |
| HSPA5      | heat shock 70kDa protein 5 (glucose-regulated protein, 78kDa)          | 3309   | <b>1.34</b>  |  |              | <b>0.8</b>   |
| HSPB1      | heat shock 27kDa protein 1                                             | 3315   |              |  | <b>2.53</b>  |              |
| ID2        | inhibitor of DNA binding 2, dominant negative helix-loop-helix protein | 3398   | <b>0.690</b> |  |              |              |
| IFITM2     | interferon induced transmembrane protein 2 (1-8D)                      | 10581  | <b>1.74</b>  |  | <b>0.700</b> | <b>0.900</b> |
| IGF2BP3    | insulin-like growth factor 2 mRNA binding protein 3                    | 10643  | <b>1.12</b>  |  |              |              |
| IGF2R      | insulin-like growth factor 2 receptor                                  | 3482   | <b>2.17</b>  |  |              |              |
| IGFBP3     | insulin-like growth factor binding protein 3                           | 3486   | <b>0.14</b>  |  |              |              |
| IGFBP5     | insulin-like growth factor binding protein 5                           | 3488   |              |  |              | <b>0.930</b> |
| IGSF21     | immunoglobulin superfamily, member 21                                  | 84966  | <b>0.8</b>   |  |              |              |
| ILVBL      | ilvB (bacterial acetolactate synthase)-like                            | 10994  |              |  |              | <b>0.870</b> |

|           |                                                                    |        |       |  |       |       |
|-----------|--------------------------------------------------------------------|--------|-------|--|-------|-------|
| INF2      | inverted formin, FH2 and WH2 domain containing                     | 64423  | 1.3   |  |       |       |
| IRS2      | insulin receptor substrate 2                                       | 8660   |       |  | 0.730 |       |
| ISG20     | interferon stimulated exonuclease gene 20kDa                       | 3669   | 1.19  |  | 0.78  | 0.900 |
| ITGB5     | integrin, beta 5                                                   | 3693   |       |  | 0.740 |       |
| KCNK1     | potassium channel, subfamily K, member 1                           | 3775   | 1.22  |  |       |       |
| KIAA1324  | KIAA1324                                                           | 57535  | 0.34  |  |       |       |
| KIF1A     | kinesin family member 1A                                           | 547    | 1.9   |  |       |       |
| KIF1B     | kinesin family member 1B                                           | 23095  | 1.34  |  |       |       |
| KIF5C     | kinesin family member 5C                                           | 3800   | 1.26  |  |       |       |
| KLHL35    | kelch-like 35 (Drosophila)                                         | 283212 | 0.720 |  | 0.690 |       |
| LACTB2    | lactamase, beta 2                                                  | 51110  | 1.35  |  | 1.41  |       |
| LAD1      | ladinin 1                                                          | 3898   | 0.57  |  | 0.690 | 0.870 |
| LDOC1     | leucine zipper, down-regulated in cancer 1                         | 23641  | 0.660 |  |       |       |
| LEF1      | lymphoid enhancer-binding factor 1                                 | 51176  | 0.490 |  |       | 1.51  |
| LEPREL1   | leprecan-like 1                                                    | 55214  |       |  |       | 1.1   |
| LIMCH1    | LIM and calponin homology domains 1                                | 22998  | 0.660 |  |       |       |
| LMO4      | LIM domain only 4                                                  | 8543   | 0.730 |  |       | 1.14  |
| LOC497256 | hypothetical LOC497256                                             | 497256 | 2.7   |  |       |       |
| LOC653506 | similar to meteorin, glial cell differentiation regulator-like     | 653506 | 1.31  |  | 0.670 |       |
| LOC729887 | hypothetical protein LOC729887                                     | 729887 | 0.860 |  |       | 1.04  |
| LPAR2     | lysophosphatidic acid receptor 2                                   | 9170   | 0.820 |  | 0.850 |       |
| LPL       | lipoprotein lipase                                                 | 4023   |       |  |       | 0.430 |
| LYRM5     | LYR motif containing 5                                             | 144363 | 1.24  |  | 1.31  |       |
| LYSMD2    | LysM, putative peptidoglycan-binding, domain containing 2          | 256586 | 0.830 |  |       |       |
| MAGEA1    | melanoma antigen family A, 1 (directs expression of antigen MZ2-E) | 4100   | 1.88  |  |       |       |
| MAGED1    | melanoma antigen family D, 1                                       | 9500   | 1.24  |  |       |       |
| MAOA      | monoamine oxidase A                                                | 4128   | 5.02  |  |       |       |
| MAP1LC3A  | microtubule-associated protein 1 light chain 3 alpha               | 84557  | 1.3   |  |       |       |
| MBP       | myelin basic protein                                               | 4155   | 2.69  |  |       |       |
| MDK       | midkine (neurite growth-promoting factor 2)                        | 4192   | 1.85  |  |       |       |
| ME1       | malic enzyme 1, NADP(+)-dependent, cytosolic                       | 4199   | 0.670 |  |       | 0.840 |
| MFGE8     | milk fat globule-EGF factor 8 protein                              | 4240   | 1.54  |  | 0.790 |       |
| MGST1     | microsomal glutathione S-transferase 1                             | 4257   | 0.730 |  | 2.63  |       |

|         |                                                                                     |       |              |       |              |              |
|---------|-------------------------------------------------------------------------------------|-------|--------------|-------|--------------|--------------|
| MIDN    | midnolin                                                                            | 90007 | <b>1.36</b>  |       |              |              |
| MIPEP   | mitochondrial intermediate peptidase                                                | 4285  | <b>1.64</b>  |       | <b>0.670</b> |              |
| MLPH    | melanophilin                                                                        | 79083 |              |       |              | <b>1.27</b>  |
| MT1E    | metallothionein 1E                                                                  | 4493  | <b>1.47</b>  |       | <b>1.89</b>  |              |
| MT1G    | metallothionein 1G                                                                  | 4495  | <b>8.43</b>  |       |              |              |
| MT1X    | metallothionein 1X                                                                  | 4501  | <b>1.51</b>  |       | <b>1.48</b>  |              |
| MT2A    | metallothionein 2A                                                                  | 4502  | <b>1.22</b>  | 0.690 | <b>1.67</b>  | <b>0.58</b>  |
| NBL1    | neuroblastoma, suppression of tumorigenicity 1                                      | 4681  |              |       |              | <b>1.39</b>  |
| NCAM2   | neural cell adhesion molecule 2                                                     | 4685  | <b>1.65</b>  |       |              |              |
| NDRG1   | N-myc downstream regulated 1                                                        | 10397 |              |       |              | <b>0.670</b> |
| NET1    | neuroepithelial cell transforming 1                                                 | 10276 | <b>1.21</b>  |       | <b>0.630</b> |              |
| NFKBIA  | nuclear factor of kappa light polypeptide gene enhancer in B-cells inhibitor, alpha | 4792  | <b>0.670</b> |       |              |              |
| NINJ1   | ninjurin 1                                                                          | 4814  | <b>1.16</b>  |       |              | <b>0.900</b> |
| NKX3-1  | NK3 homeobox 1                                                                      | 4824  |              |       | <b>0.700</b> |              |
| NLGN4X  | neuroligin 4, X-linked                                                              | 57502 | <b>2.92</b>  |       |              |              |
| NME4    | NME/NM23 nucleoside diphosphate kinase 4                                            | 4833  |              |       | <b>0.850</b> |              |
| NQO1    | NAD(P)H dehydrogenase, quinone 1                                                    | 1728  | <b>0.460</b> |       |              |              |
| OPLAH   | 5-oxoprolinase (ATP-hydrolysing)                                                    | 26873 | <b>0.820</b> |       |              |              |
| P4HA1   | prolyl 4-hydroxylase, alpha polypeptide I                                           | 5033  | <b>1.86</b>  |       |              |              |
| PACSIN1 | protein kinase C and casein kinase substrate in neurons 1                           | 29993 | <b>1.38</b>  |       |              |              |
| PALM    | paralemmin                                                                          | 5064  | <b>1.27</b>  |       |              |              |
| PAM     | peptidylglycine alpha-amidating monooxygenase                                       | 5066  | <b>0.490</b> |       | <b>0.770</b> | <b>1.14</b>  |
| PARP10  | poly (ADP-ribose) polymerase family, member 10                                      | 84875 | <b>0.700</b> |       |              |              |
| PARP3   | poly (ADP-ribose) polymerase family, member 3                                       | 10039 | <b>0.810</b> |       |              |              |
| PBDC1   | polysaccharide biosynthesis domain containing 1                                     | 51260 |              |       | <b>0.820</b> |              |
| PCDH7   | protocadherin 7                                                                     | 5099  |              |       | <b>0.8</b>   |              |
| PCK2    | phosphoenolpyruvate carboxykinase 2 (mitochondrial)                                 | 5106  | <b>0.810</b> |       |              |              |
| PECI    | peroxisomal D3,D2-enoyl-CoA isomerase                                               | 10455 | <b>0.730</b> |       | <b>2.38</b>  |              |
| PEX11G  | peroxisomal biogenesis factor 11 gamma                                              | 92960 | <b>1.16</b>  |       |              |              |
| PFKFB3  | 6-phosphofructo-2-kinase/ fructose-2,6-biphosphatase 3                              | 5209  |              |       | <b>0.740</b> | <b>0.890</b> |
| PFKFB4  | 6-phosphofructo-2-kinase/ fructose-2,6-biphosphatase 4                              | 5210  |              |       |              | <b>1.12</b>  |



|          |                                                           |        |              |  |              |              |
|----------|-----------------------------------------------------------|--------|--------------|--|--------------|--------------|
| PFKP     | phosphofructokinase, platelet                             | 5214   |              |  | <b>0.820</b> |              |
| PGAM1    | phosphoglycerate mutase 1 (brain)                         | 5223   | <b>2.21</b>  |  |              |              |
| PLA2G16  | phospholipase A2, group XVI                               | 11145  |              |  | <b>1.25</b>  | <b>0.750</b> |
| PLD6     | phospholipase D family, member 6                          | 201164 |              |  |              | <b>1.08</b>  |
| PLOD1    | procollagen-lysine 1, 2-oxoglutarate 5-dioxygenase 1      | 5351   | <b>2.22</b>  |  |              |              |
| PNPLA7   | patatin-like phospholipase domain containing 7            | 375775 | <b>1.55</b>  |  |              | <b>1.6</b>   |
| PPAP2A   | phosphatidic acid phosphatase type 2A                     | 8611   |              |  | <b>1.13</b>  | <b>0.790</b> |
| PPIC     | peptidylprolyl isomerase C (cyclophilin C)                | 5480   | <b>0.840</b> |  |              |              |
| PPP1R1B  | protein phosphatase 1, regulatory (inhibitor) subunit 1B  | 84152  | <b>0.850</b> |  |              |              |
| PRAC     | prostate cancer susceptibility candidate                  | 84366  |              |  | <b>0.700</b> |              |
| PRAME    | preferentially expressed antigen in melanoma              | 23532  |              |  | <b>1.22</b>  |              |
| PRICKLE1 | prickle homolog 1 (Drosophila)                            | 144165 |              |  | <b>0.880</b> |              |
| PRKACB   | protein kinase, cAMP-dependent, catalytic, beta           | 5567   | <b>1.81</b>  |  |              |              |
| PROSC    | proline synthetase co-transcribed homolog (bacterial)     | 11212  |              |  | <b>1.2</b>   |              |
| PRPH     | peripherin                                                | 5630   | <b>1.65</b>  |  |              | <b>1.27</b>  |
| PRSS8    | protease, serine, 8                                       | 5652   | <b>1.51</b>  |  |              |              |
| PRUNE2   | prune homolog 2 (Drosophila)                              | 158471 | <b>0.28</b>  |  |              |              |
| PSAP     | prosaposin                                                | 5660   | <b>1.15</b>  |  | <b>0.610</b> |              |
| PTTG1    | pituitary tumor-transforming 1                            | 9232   |              |  | <b>1.28</b>  |              |
| RAMP1    | receptor (G protein-coupled) activity modifying protein 1 | 10267  | <b>3.67</b>  |  |              |              |
| RAP1GAP  | RAP1 GTPase activating protein                            | 5909   | <b>0.740</b> |  |              | <b>1.73</b>  |
| RBPMS2   | RNA binding protein with multiple splicing 2              | 348093 |              |  | <b>1.18</b>  |              |
| RCN1     | reticulocalbin 1, EF-hand calcium binding domain          | 5954   |              |  | <b>0.770</b> |              |
| RCOR2    | REST corepressor 2                                        | 283248 | <b>1.12</b>  |  | <b>1.42</b>  | <b>1.04</b>  |
| RHOBTB3  | Rho-related BTB domain containing 3                       | 22836  | <b>1.15</b>  |  |              |              |
| RHOU     | ras homolog gene family, member U                         | 58480  | <b>0.440</b> |  | <b>1.2</b>   | <b>0.78</b>  |
| RNASE4   | ribonuclease, RNase A family, 4                           | 6038   | <b>0.78</b>  |  |              |              |
| RND3     | Rho family GTPase 3                                       | 390    |              |  |              | <b>0.910</b> |
| RNF103   | ring finger protein 103                                   | 7844   | <b>0.78</b>  |  |              |              |
| RPL13    | ribosomal protein L13                                     | 6137   | <b>0.790</b> |  |              |              |
| RPL23A   | ribosomal protein L23a                                    | 6147   |              |  | <b>0.820</b> |              |
| RPL29    | ribosomal protein L29                                     | 6159   |              |  |              | <b>0.870</b> |
| RTN4     | reticulon 4                                               | 57142  | <b>1.16</b>  |  |              | <b>1.18</b>  |

|          |                                                                                               |           |              |      |              |              |
|----------|-----------------------------------------------------------------------------------------------|-----------|--------------|------|--------------|--------------|
| S100P    | S100 calcium binding protein P                                                                | 6286      | <b>0.720</b> |      | <b>0.380</b> |              |
| SBK1     | SH3-binding domain kinase 1                                                                   | 388228    | <b>1.78</b>  |      | <b>0.770</b> |              |
| SCML1    | sex comb on midleg-like 1 (Drosophila)                                                        | 6322      |              |      |              | <b>0.78</b>  |
| SCNN1A   | sodium channel, nonvoltage-gated 1 alpha                                                      | 6337      | <b>1.53</b>  |      |              | <b>0.680</b> |
| SEL1L3   | sel-1 suppressor of lin-12-like 3 (C. elegans)                                                | 23231     |              |      |              | <b>1.09</b>  |
| SEPT5    | septin 5                                                                                      | 5413      | <b>1.77</b>  |      |              | <b>1.25</b>  |
| SERF1B   | small EDRK-rich factor 1B (centromeric)                                                       | 728492    | <b>1.28</b>  |      |              |              |
| SERPINB6 | serpin peptidase inhibitor, clade B (ovalbumin), member 6                                     | 5269      |              |      |              | <b>1.35</b>  |
| SERPINE2 | serpin peptidase inhibitor, clade E (nexin, plasminogen activator inhibitor type 1), member 2 | 5270      | <b>0.620</b> | 2.27 |              | <b>0.870</b> |
| SERPINI1 | serpin peptidase inhibitor, clade I (neuroserpin), member 1                                   | 5274      |              |      |              | <b>1.8</b>   |
| SGCE     | sarcoglycan, epsilon                                                                          | 8910      |              |      | <b>1.21</b>  |              |
| SH3BGRL  | SH3 domain binding glutamic acid-rich protein like                                            | 6451      | <b>1.54</b>  |      |              |              |
| SHROOM3  | shroom family member 3                                                                        | 57619     |              |      |              | <b>0.760</b> |
| SLC16A3  | solute carrier family 16, member 3 (monocarboxylic acid transporter 4)                        | 9123      | <b>1.41</b>  |      | <b>1.31</b>  |              |
| SLC25A4  | solute carrier family 25 (mitochondrial carrier; adenine nucleotide translocator), member 4   | 291       |              |      |              | <b>0.820</b> |
| SLC25A6  | solute carrier family 25 (mitochondrial carrier; adenine nucleotide translocator), member 6   | 293       | <b>0.750</b> |      | <b>0.830</b> |              |
| SLC2A12  | solute carrier family 2 (facilitated glucose transporter), member 12                          | 154091    | <b>1.28</b>  |      |              |              |
| SLC6A10P | solute carrier family 6 (neurotransmitter transporter, creatine), member 10 (pseudogene)      | 386757    |              |      | <b>0.820</b> | <b>0.850</b> |
| SNHG5    | small nucleolar RNA host gene 5 (non-protein coding)                                          | 387066    | <b>0.5</b>   |      |              |              |
| SNHG6    | small nucleolar RNA host gene 6 (non-protein coding)                                          | 641638    |              |      |              | <b>1.13</b>  |
| SNHG7    | small nucleolar RNA host gene 7 (non-protein coding)                                          | 84973     | <b>0.820</b> |      |              |              |
| SNHG8    | small nucleolar RNA host gene 8 (non-protein coding)                                          | 100093630 | <b>0.560</b> |      |              |              |
| SNHG9    | small nucleolar RNA host gene 9 (non-protein coding)                                          | 735301    | <b>1.15</b>  |      |              |              |

|          |                                                                     |        |              |  |              |              |
|----------|---------------------------------------------------------------------|--------|--------------|--|--------------|--------------|
| SNORA18  | small nucleolar RNA, H/ACA box 18                                   | 677805 | <b>0.660</b> |  |              |              |
| SNRPN    | small nuclear ribonucleoprotein polypeptide N                       | 6638   | <b>1.53</b>  |  |              |              |
| SOX11    | SRY (sex determining region Y)-box 11                               | 6664   |              |  | <b>0.670</b> |              |
| SPON2    | spondin 2, extracellular matrix protein                             | 10417  | <b>1.73</b>  |  |              | <b>2.62</b>  |
| SQSTM1   | sequestosome 1                                                      | 8878   | <b>0.590</b> |  |              | <b>1.22</b>  |
| SSR2     | signal sequence receptor, beta (translocon-associated protein beta) | 6746   | <b>0.790</b> |  |              |              |
| STEAP1   | six transmembrane epithelial antigen of the prostate 1              | 26872  | <b>1.49</b>  |  |              |              |
| STK24    | serine/threonine kinase 24                                          | 8428   | <b>1.5</b>   |  |              | <b>1.2</b>   |
| SYT4     | synaptotagmin IV                                                    | 6860   | <b>5.84</b>  |  |              |              |
| SYT7     | synaptotagmin VII                                                   | 9066   | <b>1.19</b>  |  |              |              |
| TACC1    | transforming, acidic coiled-coil containing protein 1               | 6867   | <b>6.68</b>  |  |              |              |
| TAGLN2   | transgelin 2                                                        | 8407   |              |  |              | <b>0.860</b> |
| TARP     | TCR gamma alternate reading frame protein                           | 445347 |              |  |              | <b>4.34</b>  |
| TBX3     | T-box 3                                                             | 6926   | <b>1.29</b>  |  | <b>1.35</b>  |              |
| TCEA3    | transcription elongation factor A (SII), 3                          | 6920   | <b>0.790</b> |  |              |              |
| TCEAL3   | transcription elongation factor A (SII)-like 3                      | 85012  | <b>5.76</b>  |  |              | <b>1.12</b>  |
| TFF3     | trefoil factor 3 (intestinal)                                       | 7033   | <b>1.94</b>  |  |              |              |
| TGIF1    | TGFB-induced factor homeobox 1                                      | 7050   | <b>0.790</b> |  | <b>0.58</b>  |              |
| THNSL2   | threonine synthase-like 2 (S. cerevisiae)                           | 55258  | <b>1.25</b>  |  |              |              |
| TLE1     | transducin-like enhancer of split 1 (E(sp1) homolog, Drosophila)    | 7088   | <b>0.37</b>  |  |              |              |
| TM4SF1   | transmembrane 4 L six family member 1                               | 4071   |              |  | <b>0.630</b> |              |
| TMEM14C  | transmembrane protein 14C                                           | 51522  | <b>0.810</b> |  |              | <b>1.18</b>  |
| TMEM158  | transmembrane protein 158 (gene/pseudogene)                         | 25907  | <b>0.730</b> |  |              | <b>1.46</b>  |
| TMEM194A | transmembrane protein 194A                                          | 23306  | <b>0.820</b> |  |              |              |
| TMEM205  | transmembrane protein 205                                           | 374882 | <b>21.57</b> |  |              |              |
| TMPRSS2  | transmembrane protease, serine 2                                    | 7113   |              |  | <b>0.8</b>   | <b>1.23</b>  |
| TMSB10   | thymosin beta 10                                                    | 9168   | <b>0.860</b> |  |              |              |
| TMSB15A  | thymosin beta 15a                                                   | 11013  |              |  | <b>0.750</b> |              |
| TMSB15B  | thymosin beta 15B                                                   | 286527 |              |  | <b>0.78</b>  |              |
| TNFRSF19 | tumor necrosis factor receptor superfamily, member 19               | 55504  | <b>3.37</b>  |  |              |              |
| TP53TG3  | TP53 target 3                                                       | 24150  | <b>1.65</b>  |  |              |              |
| TPD52L1  | tumor protein D52-like 1                                            | 7164   | <b>0.78</b>  |  |              |              |

|         |                                                         |        |              |  |              |              |
|---------|---------------------------------------------------------|--------|--------------|--|--------------|--------------|
| TRIM68  | tripartite motif containing 68                          | 55128  | <b>2.18</b>  |  |              |              |
| TSC2    | tuberous sclerosis 2                                    | 7249   |              |  |              | <b>0.95</b>  |
| TSC22D3 | TSC22 domain family, member 3                           | 1831   |              |  | <b>0.610</b> |              |
| TSGA14  | testis specific, 14                                     | 95681  | <b>1.21</b>  |  |              |              |
| TSPAN8  | tetraspanin 8                                           | 7103   | <b>0.21</b>  |  |              |              |
| TSPAN9  | tetraspanin 9                                           | 10867  | <b>1.65</b>  |  |              |              |
| TSPY2   | testis specific protein, Y-linked 2                     | 64591  | <b>1.17</b>  |  |              |              |
| TSPY8   | testis specific protein, Y-linked 8                     | 728403 | <b>1.19</b>  |  |              | <b>0.960</b> |
| TST     | thiosulfate sulfurtransferase (rhodanese)               | 7263   | <b>0.830</b> |  |              |              |
| TUBB3   | tubulin, beta 3                                         | 10381  | <b>1.77</b>  |  | <b>0.750</b> |              |
| TXNDC5  | thioredoxin domain containing 5 (endoplasmic reticulum) | 81567  | <b>0.64</b>  |  |              |              |
| VAMP8   | vesicle-associated membrane protein 8 (endobrevin)      | 8673   | <b>0.840</b> |  |              |              |
| VCX     | variable charge, X-linked                               | 26609  |              |  | <b>1.75</b>  |              |
| VCX2    | variable charge, X-linked 2                             | 51480  | <b>2.28</b>  |  | <b>1.97</b>  |              |
| VCX3A   | variable charge, X-linked 3A                            | 51481  | <b>6.23</b>  |  | <b>1.72</b>  |              |
| VCX3B   | variable charge, X-linked 3B                            | 425054 |              |  | <b>1.78</b>  |              |
| VCY     | variable charge, Y-linked                               | 9084   | <b>1.78</b>  |  | <b>1.87</b>  | <b>0.960</b> |
| VEGFB   | vascular endothelial growth factor B                    | 7423   | <b>7.29</b>  |  |              |              |
| WBP5    | WW domain binding protein 5                             | 51186  | <b>1.32</b>  |  | <b>0.690</b> |              |
| WDR72   | WD repeat domain 72                                     | 256764 | <b>3</b>     |  |              |              |
| WNT5A   | wingless-type MMTV integration site family, member 5A   | 7474   |              |  |              | <b>1.07</b>  |
| XAGE1A  | X antigen family, member 1A                             | 653219 | <b>2.04</b>  |  | <b>0.820</b> |              |
| YBX2    | Y box binding protein 2                                 | 51087  |              |  | <b>1.55</b>  |              |
| ZDHHC4  | zinc finger, DHHC-type containing 4                     | 55146  | <b>1.22</b>  |  | <b>1.23</b>  |              |
| ZDHHC7  | zinc finger, DHHC-type containing 7                     | 55625  | <b>1.26</b>  |  | <b>0.820</b> |              |
| ZDHHC8  | zinc finger, DHHC-type containing 8                     | 29801  | <b>0.8</b>   |  | <b>0.750</b> |              |
| ZFYVE21 | zinc finger, FYVE domain containing 21                  | 79038  |              |  |              | <b>1.08</b>  |
| ZIC2    | Zic family member 2 (odd-paired homolog, Drosophila)    | 7546   | <b>0.680</b> |  |              | <b>0.890</b> |
| ZNF385B | zinc finger protein 385B                                | 151126 |              |  |              | <b>1.24</b>  |
| ZSCAN18 | zinc finger and SCAN domain containing 18               | 65982  | <b>2.43</b>  |  |              |              |
| ZYX     | zyxin                                                   | 7791   | <b>1.39</b>  |  |              | <b>1.13</b>  |



**Supplementary Table S4: (In Reference to Figure 6D)**

| <b>Ingenuity Canonical Pathways</b>                  | <b>-log (p-value)</b> | <b>Ratio</b> | <b>Molecules</b>      |
|------------------------------------------------------|-----------------------|--------------|-----------------------|
| Hepatic Fibrosis / Hepatic Stellate Cell Activation  | 3.51E+0               | 1.52E-2      | BAMBI, COL4A5, IGFBP5 |
| Leucine Degradation I                                | 2.21E+0               | 1.11E-1      | MCCC2                 |
| Inhibition of Angiogenesis by TSP1                   | 1.63E+0               | 2.94E-2      | GUCY1A3               |
| Neuroprotective Role of THOP1 in Alzheimer's Disease | 1.57E+0               | 2.50E-2      | MME                   |
| Phototransduction Pathway                            | 1.44E+0               | 1.89E-2      | GUCY1A3               |
| Antiproliferative Role of Somatostatin Receptor 2    | 1.37E+0               | 1.59E-2      | GUCY1A3               |
| VDR/RXR Activation                                   | 1.28E+0               | 1.28E-2      | IGFBP5                |
| Neuregulin Signaling                                 | 1.23E+0               | 1.14E-2      | TMEFF2                |
| IGF-1 Signaling                                      | 1.19E+0               | 1.03E-2      | IGFBP5                |
| Nitric Oxide Signaling in the Cardiovascular System  | 1.18E+0               | 1.00E-2      | GUCY1A3               |
| Corticotropin Releasing Hormone Signaling            | 1.13E+0               | 9.01E-3      | GUCY1A3               |
| Sperm Motility                                       | 1.10E+0               | 8.26E-3      | GUCY1A3               |
| Cellular Effects of Sildenafil (Viagra)              | 1.07E+0               | 7.75E-3      | GUCY1A3               |
| Relaxin Signaling                                    | 1.05E+0               | 7.41E-3      | GUCY1A3               |
| Synaptic Long Term Depression                        | 1.03E+0               | 7.04E-3      | GUCY1A3               |
| eNOS Signaling                                       | 1.03E+0               | 7.04E-3      | GUCY1A3               |
| Gap Junction Signaling                               | 9.93E-1               | 6.45E-3      | GUCY1A3               |
| Dopamine-DARPP32 Feedback in cAMP Signaling          | 9.77E-1               | 6.21E-3      | GUCY1A3               |
| Endothelin-1 Signaling                               | 9.50E-1               | 5.81E-3      | GUCY1A3               |
| Sertoli Cell-Sertoli Cell Junction Signaling         | 9.36E-1               | 5.62E-3      | GUCY1A3               |
| Glucocorticoid Receptor Signaling                    | 7.60E-1               | 3.64E-3      | ANXA1                 |

**Supplementary Table S5: (In Reference to Figure 7D)**

| Ingenuity Canonical Pathways                               | -log (p-value) | Ratio   | Molecules   |
|------------------------------------------------------------|----------------|---------|-------------|
| Gluconeogenesis I                                          | 2.62E+0        | 8.00E-2 | ENO2,ME1    |
| Creatine-phosphate Biosynthesis                            | 1.94E+0        | 2.50E-1 | CKB         |
| Galactose Degradation I (Leloir Pathway)                   | 1.84E+0        | 2.00E-1 | GALK1       |
| Phosphatidylcholine Biosynthesis I                         | 1.70E+0        | 1.43E-1 | CHPT1       |
| TR/RXR Activation                                          | 1.60E+0        | 2.35E-2 | ME1,SLC16A3 |
| Virus Entry via Endocytic Pathways                         | 1.56E+0        | 2.25E-2 | HLA-A,CXADR |
| Amyotrophic Lateral Sclerosis Signaling                    | 1.48E+0        | 2.04E-2 | GPX1,PRPH   |
| Choline Biosynthesis III                                   | 1.43E+0        | 7.69E-2 | CHPT1       |
| Colanic Acid Building Blocks Biosynthesis                  | 1.40E+0        | 7.14E-2 | GALK1       |
| Parkinson's Signaling                                      | 1.34E+0        | 6.25E-2 | SEPTIN 5    |
| RhoA Signaling                                             | 1.31E+0        | 1.64E-2 | LPAR2,SEPT5 |
| Glutathione Redox Reactions I                              | 1.27E+0        | 5.26E-2 | GPX1        |
| Bupropion Degradation                                      | 1.15E+0        | 4.00E-2 | CYP2J2      |
| Glycolysis I                                               | 1.15E+0        | 4.00E-2 | ENO2        |
| Acetone Degradation I (to Methylglyoxal)                   | 1.14E+0        | 3.85E-2 | CYP2J2      |
| Germ Cell-Sertoli Cell Junction Signaling                  | 1.10E+0        | 1.25E-2 | ZYX,RHOU    |
| Cytotoxic T Lymphocyte-mediated Apoptosis of Target Cells  | 1.05E+0        | 3.12E-2 | HLA-A       |
| Oncostatin M Signaling                                     | 1.03E+0        | 2.94E-2 | MT2A        |
| Interferon Signaling                                       | 1.03E+0        | 2.94E-2 | IFITM2      |
| Estrogen Biosynthesis                                      | 9.91E-1        | 2.70E-2 | CYP2J2      |
| Antigen Presentation Pathway                               | 9.91E-1        | 2.70E-2 | HLA-A       |
| Neuroprotective Role of THOP1 in Alzheimer's Disease       | 9.59E-1        | 2.50E-2 | HLA-A       |
| Integrin Signaling                                         | 9.37E-1        | 9.95E-3 | ZYX,RHOU    |
| Role of Oct4 in Mammalian Embryonic Stem Cell Pluripotency | 9.02E-1        | 2.17E-2 | CCNF        |
| Graft-versus-Host Disease Signaling                        | 8.85E-1        | 2.08E-2 | HLA-A       |
| Autoimmune Thyroid Disease Signaling                       | 8.76E-1        | 2.04E-2 | HLA-A       |
| Semaphorin Signaling in Neurons                            | 8.45E-1        | 1.89E-2 | RHOU        |
| Nicotine Degradation III                                   | 8.37E-1        | 1.85E-2 | CYP2J2      |
| Signaling by Rho Family GTPases                            | 8.30E-1        | 8.55E-3 | RHOU,SEPT5  |
| Actin Nucleation by ARP-WASP Complex                       | 8.23E-1        | 1.79E-2 | RHOU        |
| Glioma Invasiveness Signaling                              | 8.16E-1        | 1.75E-2 | RHOU        |
| Melatonin Degradation I                                    | 8.16E-1        | 1.75E-2 | CYP2J2      |
| Induction of Apoptosis by HIV1                             | 7.95E-1        | 1.67E-2 | SLC25A6     |
| Superpathway of Melatonin Degradation                      | 7.82E-1        | 1.61E-2 | CYP2J2      |
| Nicotine Degradation II                                    | 7.76E-1        | 1.59E-2 | CYP2J2      |
| Remodeling of Epithelial Adherens Junctions                | 7.46E-1        | 1.47E-2 | ZYX         |
| Caveolar-mediated Endocytosis Signaling                    | 7.29E-1        | 1.41E-2 | HLA-A       |
| T Helper Cell Differentiation                              | 7.29E-1        | 1.41E-2 | BCL6        |
| Allograft Rejection Signaling                              | 6.54E-1        | 1.16E-2 | HLA-A       |
| TGF- $\beta$ Signaling                                     | 6.50E-1        | 1.15E-2 | TGIF1       |
| CTLA4 Signaling in Cytotoxic T Lymphocytes                 | 6.46E-1        | 1.14E-2 | HLA-A       |
| Crosstalk between Dendritic Cells and Natural Killer Cells | 6.41E-1        | 1.12E-2 | HLA-A       |
| OX40 Signaling Pathway                                     | 6.41E-1        | 1.12E-2 | HLA-A       |

|                                                                       |         |         |              |
|-----------------------------------------------------------------------|---------|---------|--------------|
| Regulation of Actin-based Motility by Rho                             | 6.33E-1 | 1.10E-2 | RHO          |
| Communication between Innate and Adaptive Immune Cells                | 6.33E-1 | 1.10E-2 | HLA-A        |
| VEGF Signaling                                                        | 6.29E-1 | 1.09E-2 | EIF2S3       |
| p53 Signaling                                                         | 6.05E-1 | 1.02E-2 | SERPINE2     |
| Cholecystokinin/Gastrin-mediated Signaling                            | 5.93E-1 | 9.90E-3 | RHO          |
| Sphingosine-1-phosphate Signaling                                     | 5.65E-1 | 9.17E-3 | RHO          |
| Type I Diabetes Mellitus Signaling                                    | 5.62E-1 | 9.09E-3 | HLA-A        |
| phagosome formation                                                   | 5.58E-1 | 9.01E-3 | RHO          |
| G12/13 Signaling                                                      | 5.39E-1 | 8.55E-3 | LPAR2        |
| HMGB1 Signaling                                                       | 5.30E-1 | 8.33E-3 | RHO          |
| phagosome maturation                                                  | 5.30E-1 | 8.33E-3 | HLA-A        |
| Adipogenesis pathway                                                  | 5.09E-1 | 7.87E-3 | BSCL2        |
| eNOS Signaling                                                        | 4.70E-1 | 7.04E-3 | LPAR2        |
| Regulation of eIF4 and p70S6K Signaling                               | 4.60E-1 | 6.85E-3 | EIF2S3       |
| Glioblastoma Multiforme Signaling                                     | 4.60E-1 | 6.85E-3 | RHO          |
| Epithelial Adherens Junction Signaling                                | 4.60E-1 | 6.85E-3 | ZYX          |
| Gq Signaling                                                          | 4.57E-1 | 6.80E-3 | RHO          |
| AMPK Signaling                                                        | 4.55E-1 | 6.76E-3 | PFKFB3       |
| CXCR4 Signaling                                                       | 4.46E-1 | 6.58E-3 | RHO          |
| Axonal Guidance Signaling                                             | 4.45E-1 | 4.62E-3 | RTN4,ADAMTS1 |
| Tec Kinase Signaling                                                  | 4.32E-1 | 6.33E-3 | RHO          |
| Cdc42 Signaling                                                       | 4.14E-1 | 5.99E-3 | HLA-A        |
| RhoGDI Signaling                                                      | 4.02E-1 | 5.78E-3 | RHO          |
| B Cell Receptor Signaling                                             | 3.96E-1 | 5.68E-3 | BCL6         |
| Dendritic Cell Maturation                                             | 3.90E-1 | 5.59E-3 | HLA-A        |
| Production of Nitric Oxide and Reactive Oxygen Species in Macrophages | 3.88E-1 | 5.56E-3 | RHO          |
| IL-8 Signaling                                                        | 3.81E-1 | 5.43E-3 | RHO          |
| EIF2 Signaling                                                        | 3.79E-1 | 5.41E-3 | EIF2S3       |
| ILK Signaling                                                         | 3.78E-1 | 5.38E-3 | RHO          |
| mTOR Signaling                                                        | 3.74E-1 | 5.32E-3 | RHO          |
| Thrombin Signaling                                                    | 3.69E-1 | 5.24E-3 | RHO          |
| Systemic Lupus Erythematosus Signaling                                | 3.24E-1 | 4.55E-3 | HLA-A        |
| Cardiac Hypertrophy Signaling                                         | 3.20E-1 | 4.48E-3 | RHO          |
| Huntington's Disease Signaling                                        | 3.10E-1 | 4.35E-3 | RCOR2        |
| Colorectal Cancer Metastasis Signaling                                | 3.02E-1 | 4.24E-3 | RHO          |
| Phospholipase C Signaling                                             | 2.98E-1 | 4.18E-3 | RHO          |
| Protein Ubiquitination Pathway                                        | 2.79E-1 | 3.92E-3 | HLA-A        |

### Supplementary Table S6: PCR Primers

| Gene                | Forward Primer                | Reverse Primer             |
|---------------------|-------------------------------|----------------------------|
| AR (Exon 1-2)       | ATCCCAGTCCCCTTGTGTC           | GGTCTTCTGGGTGGAAAGT        |
| AR (Exon 4)         | CGGAAGCTGAAGAACTTGG           | ATGGCTTCCAGGACATTCAG       |
| AR V7               | CCATCTTGTCGTCTTCGGAAATGTTATGA | TTTGAATGAGGCAAGTCAGCCTTTCT |
| <i>GAPDH</i>        | GAGTCAACGGATTTGGTCGT          | TTGATTTTGGAGGGATCTCG       |
| PSA ( <i>KLK3</i> ) | TCATCCTGTCTCGGATTGTG          | ATATCGTAGAGCGGGTGTGG       |
| <i>TMPRSS2</i>      | TGTGGTCCCTTCCAATGCTGTG        | TGCTCATGGTTATGGCACTTGGC    |
